# Supplementary material for: Solid-state preparation of hybrid organometallic–organic macrocyclic adducts with long chain dicarboxylic acids
Source: Royal Society of Chemistry journal article supplement (doi:10.1039/b608691h), 2006-01-01
Supplement: b608691h-2.pdf [file b608691h-2.pdf]

Crystal data for all adducts were collected either at 293 K (**1·adipic(4)**, **1·pimelic(5)**, **1·suberic(6)**, **1·sebacic(8)**) or at 273 K (**1·azelaic(7)**) on a Bruker APEX II diffractometer [monochromator graphite, MoK $\alpha$  radiation ( $\lambda = 0.71073 \text{ \AA}$ )]. Crystals suitable for diffraction experiments were difficult to grow, in most cases polycrystalline powders were obtained with only few poorly formed single crystals. For all compounds, *Z* is referred to the number of macrocycles in the unit cell.

**1·adipic(4)**:  $\{[\text{Fe}(\eta^5\text{-C}_5\text{H}_4\text{-C}_5\text{H}_4\text{N})_2] \cdot [\text{HOOC}(\text{CH}_2)_4\text{COOH}]\}_2$ ,  $M = 972.68$ , triclinic, *P*-1,  $a = 11.276(2)$ ,  $b = 14.816(3)$ ,  $c = 28.600(6) \text{ \AA}$ ,  $\alpha = 89.201(4)$ ,  $\beta = 87.275(4)$ ,  $\gamma = 68.551(3)^\circ$ ,  $V = 4442(2) \text{ \AA}^3$ ,  $Z = 4$ ,  $\mu = 0.716$ , 15394 independent reflections (31703 measured),  $wR_2$  (all data) = 0.3563,  $R_1$  ( $I > 2\sigma(I)$ ) = 0.1189.

**1·pimelic(5)**:  $\{[\text{Fe}(\eta^5\text{-C}_5\text{H}_4\text{-C}_5\text{H}_4\text{N})_2] \cdot [\text{HOOC}(\text{CH}_2)_5\text{COOH}]\}_2$ ,  $M = 2001.46$ , *P*-1,  $a = 9.396(2)$ ,  $b = 10.667(3)$ ,  $c = 24.172(2) \text{ \AA}$ ,  $\alpha = 78.03(5)$ ,  $\beta = 88.93(2)$ ,  $\gamma = 81.25(4)^\circ$ ,  $V = 2342.2(8) \text{ \AA}^3$ ,  $Z = 1$ ,  $\mu = 0.681$ , 8019 independent reflections (16818 measured),  $wR_2$  (all data) = 0.1990,  $R_1$  ( $I > 2\sigma(I)$ ) = 0.0645.

**1·suberic(6)**:  $\{[\text{Fe}(\eta^5\text{-C}_5\text{H}_4\text{-C}_5\text{H}_4\text{N})_2] \cdot [\text{HOOC}(\text{CH}_2)_6\text{COOH}]\}_2$ ,  $M = 1028.78$ , monoclinic, *P* $2_1/c$ ,  $a = 11.107(9)$ ,  $b = 31.467(18)$ ,  $c = 14.846(12) \text{ \AA}$ ,  $\beta = 110.33(8)^\circ$ ,  $V = 4866(6) \text{ \AA}^3$ ,  $Z = 4$ ,  $\mu = 0.658$ , 7134 independent reflections (15533 measured),  $wR_2$  (all data) = 0.4224,  $R_1$  ( $I > 2\sigma(I)$ ) = 0.1271 (Only 83% of data collection completed, because of crystal decay).

**1·azelaic(7)**:  $\{[\text{Fe}(\eta^5\text{-C}_5\text{H}_4\text{-C}_5\text{H}_4\text{N})_2] \cdot [\text{HOOC}(\text{CH}_2)_7\text{COOH}]\}_2$ ,  $M = 1056.83$ , triclinic, *P*-1,  $a = 9.8845(5)$ ,  $b = 10.7413(6)$ ,  $c = 13.4321(7) \text{ \AA}$ ,  $\alpha = 76.177(1)$ ,  $\beta = 78.844(1)$ ,  $\gamma = 68.146(1)^\circ$ ,  $V = 1276.6(1) \text{ \AA}^3$ ,  $Z = 1$ ,  $\mu = 0.629$ , 5782 independent reflections (11137 measured),  $wR_2$  (all data) = 0.1046,  $R_1$  ( $I > 2\sigma(I)$ ) = 0.0390.

**1·sebacic(8)**:  $\{[\text{Fe}(\eta^5\text{-C}_5\text{H}_4\text{-C}_5\text{H}_4\text{N})_2] \cdot [\text{HOOC}(\text{CH}_2)_8\text{COOH}]\}_2$ ,  $M = 1084.88$ , triclinic, *P*-1,  $a = 11.028(2)$ ,  $b = 13.747(3)$ ,  $c = 18.765(4) \text{ \AA}$ ,  $\alpha = 96.076(3)$ ,  $\beta = 102.689(3)$ ,  $\gamma = 105.048(3)^\circ$ ,  $V = 2639.6(9) \text{ \AA}^3$ ,  $Z = 2$ ,  $\mu = 0.610$ , 5277 independent reflections (12282 measured),  $wR_2$  (all data) = 0.2152,  $R_1$  ( $I > 2\sigma(I)$ ) = 0.0694.

SHELX97<sup>1a</sup> and SCHAKAL99<sup>1b</sup> were used for structure solution and graphical representations. CCDC 614138–614141.

1 (a) G. M. Sheldrick, SHELXL97: Program for Crystal Structure Determination, University of Göttingen, Germany, 1997; (b) E. Keller, SCHAKAL99: Graphical Representation of Molecular Models, University of Freiburg, Germany, 1999; (c) W. Kraus and G. Nolze, PowderCell 2.2 (BAM Berlin) © subgroups derived by Ulrich Müller (Gh Kassel)].
